# Supplementary material for: Fabrication of titanium oxide/phthalocyanine hybrid multilayers and their application to interface control for an organic diode
Source: Royal Society of Chemistry journal article supplement (doi:10.1039/b908907a), 2009-01-01
Supplement: b908907a.pdf [file b908907a.pdf]

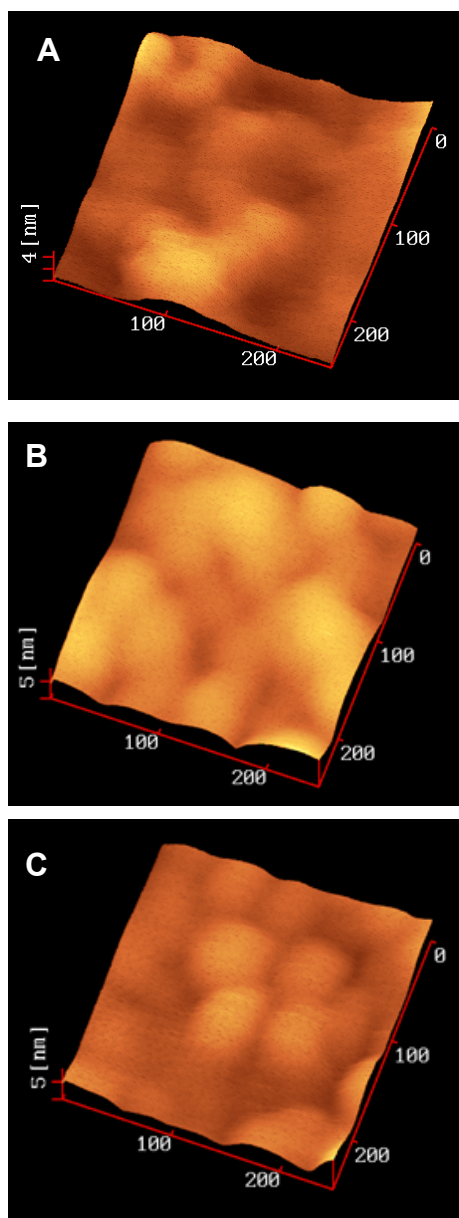

**Fig. S1.** AFM topographic surface images for (A) a pristine quartz substrate, (B) a 15-cycle **ML** of **Pc1** on quartz and (C) a 8-cycle **ML** of **Pc2** on quartz . The observed scan area is  $0.25 \mu\text{m} \times 0.25 \mu\text{m}$ .

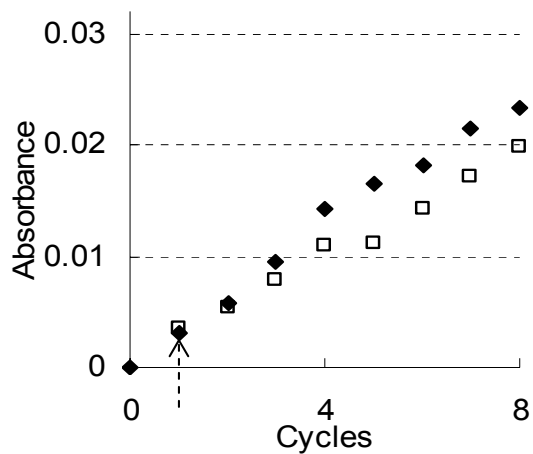

**Fig. S2.** Changes of absorbance at 670 nm of **Pc2** following the number of alternate dipping cycles for two different **TiO<sub>x</sub>-Pc<sub>2</sub>** MLs grown on a one-cycle **TiO<sub>x</sub>-Pc<sub>2</sub>** layer (◆) and on a SAM of **Pc<sub>2</sub>** (□) (shown by the broken arrow) initially fabricated on a quartz substrate.

**Table S1** XPS elemental analysis data for TiOx-**Pc** MLs<sup>a</sup>

---

|                           | C <sub>1s</sub> | N <sub>1s</sub> | O <sub>1s</sub> | Si <sub>2p</sub> | Ti <sub>2p</sub> | Ti/ <b>Pc</b> <sup>b</sup> |
|---------------------------|-----------------|-----------------|-----------------|------------------|------------------|----------------------------|
| 14-cycle TiOx- <b>Pc1</b> | 0.49            | 0.043           | 0.34            | 0.11             | 0.023            | 4.3                        |
| 6-cycle TiOx- <b>Pc2</b>  | 0.54            | 0.058           | 0.31            | 0.071            | 0.028            | 3.8                        |
| 6-cycle TiOx- <b>Pc3</b>  | 0.53            | 0.045           | 0.32            | 0.088            | 0.021            | 3.8                        |

<sup>a</sup> Measured at a take-off angle of 90° for the layers fabricated on quartz substrates. <sup>b</sup> (Ti<sub>2p</sub> × 8)/N<sub>1s</sub>.
